# Supplementary material
Source: PubMed Central journal article supplement (PMC521095)

**A**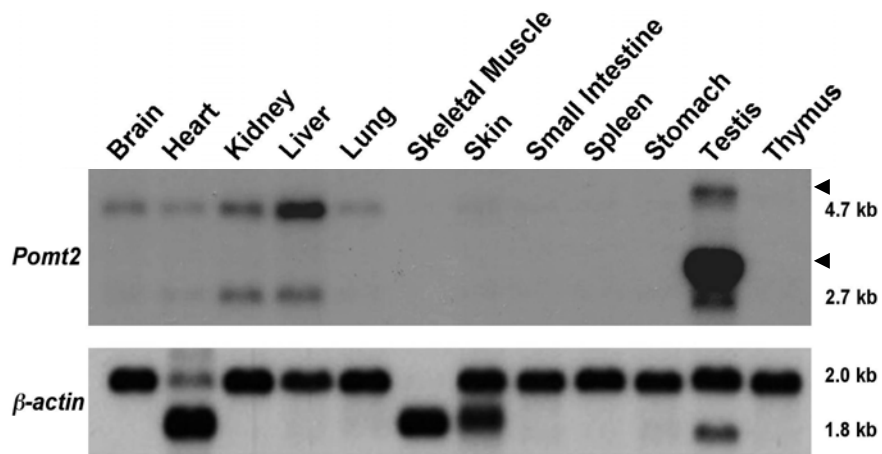**B**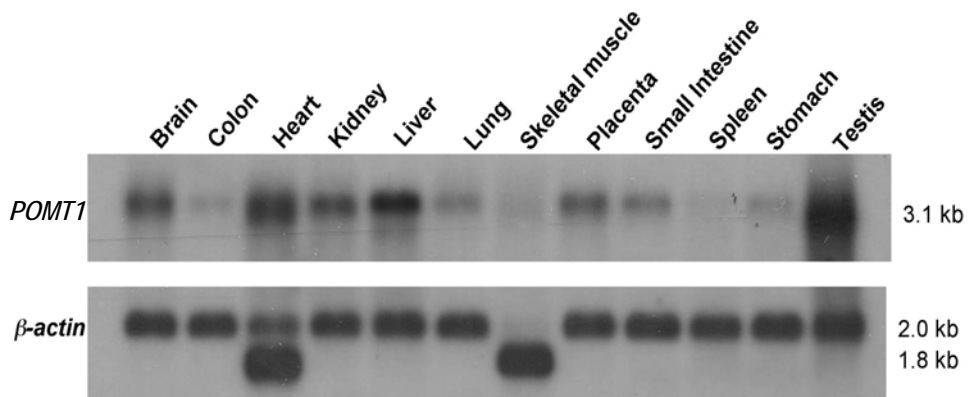**C**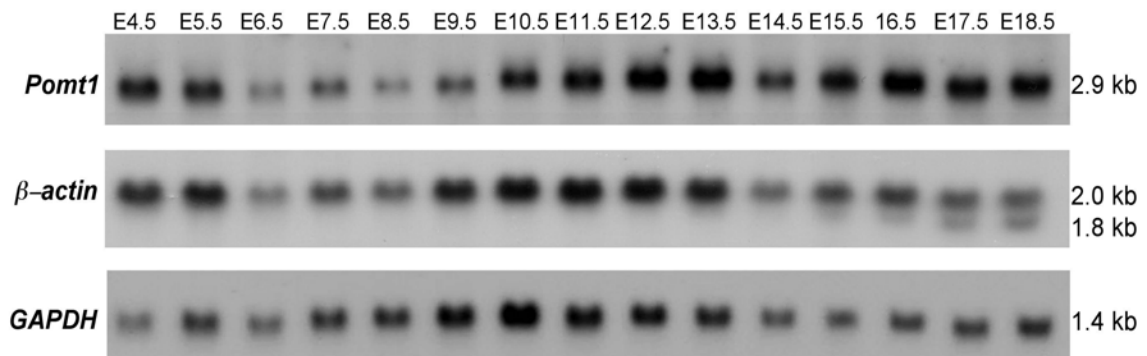

Supplement: pnas_101_39_14126__1.pdf [file pnas_101_39_14126__1.pdf]
